# Supplementary material
Source: PubMed Central journal article supplement (PMC3176514)
Supplement: ismej201141x2.pdf [file ismej201141x2.pdf]

**Supplementary Table S1.** Correlation (Spearman rank order,  $\rho$ ) between each of the three axes of the principle coordinate analysis (PC1, PC2, and PC3) and each of the measured environmental parameters or depth.

| Parameter                     | $\rho$ |       |       |
|-------------------------------|--------|-------|-------|
|                               | PC1    | PC2   | PC3   |
| Depth                         | -0.27  | 0.88  | 0.19  |
| Temperature                   | -0.09  | -0.74 | -0.48 |
| Salinity                      | -0.92  | 0.21  | 0.06  |
| Photosynthetic light (PAR)    | 0.18   | -0.78 | -0.37 |
| NO <sub>23</sub>              | -0.15  | 0.28  | 0.53  |
| NO <sub>2</sub> <sup>-</sup>  | 0.11   | 0.25  | 0.49  |
| NO <sub>3</sub> <sup>-</sup>  | -0.22  | 0.31  | 0.50  |
| PO <sub>4</sub> <sup>3-</sup> | -0.25  | 0.80  | 0.09  |
| SI                            | 0.00   | 0.75  | -0.07 |
| O <sub>2</sub>                | 0.61   | -0.57 | 0.18  |

**Supplementary Table S2.** Correlation (Spearman rank order,  $\rho$ ) between (absolute) differences in measured environmental parameters and bacterial community differences, calculated for all pairs of surface water samples.

| Parameter                     | $\rho$ |
|-------------------------------|--------|
| Temperature                   | 0.51   |
| Salinity                      | 0.81   |
| Photosynthetic light (PAR)    | 0.03   |
| NO <sub>23</sub>              | 0.27   |
| NO <sub>2</sub> <sup>-</sup>  | 0.33   |
| NO <sub>3</sub> <sup>-</sup>  | 0.31   |
| PO <sub>4</sub> <sup>3-</sup> | 0.01   |
| SI                            | 0.55   |
| O <sub>2</sub>                | 0.72   |
